# Supplementary material for: Edge and defect effects on charge distribution in collapsed MoS 2 nanotubes
Source: Royal Society of Chemistry journal article supplement (doi:10.1039/d5na00771b), 2025-01-01
Supplement: d5na00771b1.pdf [file d5na00771b1.pdf]

# SUPPLEMENTARY INFORMATION FOR

## Edge and Defect Effects on Charge Distribution in Collapsed MoS<sub>2</sub> Nanotubes

Matjaž Malok,<sup>\*a,b</sup> Janez Jelenc,<sup>a</sup> Anja Pogačnik Krajnc,<sup>a,b</sup> and Maja Remškar<sup>a</sup>

<sup>a</sup>. Solid State Physics Department, Jozef Stefan Institute, Ljubljana, Slovenia. \*E-mail: [matjaz.malok@ijs.si](mailto:matjaz.malok@ijs.si)

<sup>b</sup>. Faculty of Mathematics and Physics, University of Ljubljana, Ljubljana, Slovenia

### Table of Contents

**S1.** Topography of the area from which the nanotube was removed

**S2.** Charge injection into area from which the nanotube was removed

**S3.** Topography of the folded section of the collapsed NT

### S1. Topography of the area from which the nanotube was removed

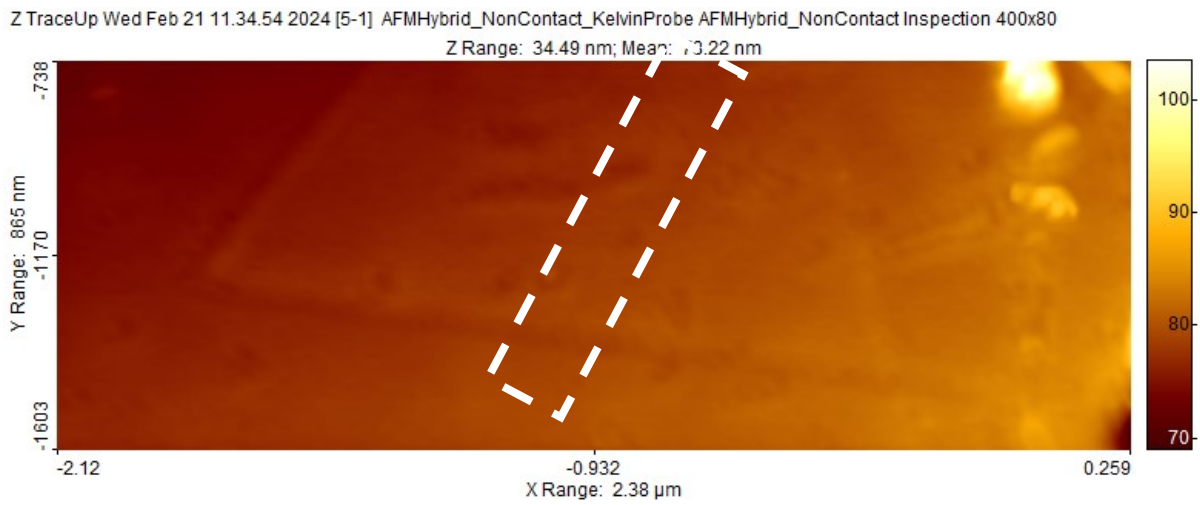

Fig. S1: Topographical image of the area from which the NT was removed. The dashed square indicates the former NT location.

## S2. Charge injection into area from which the nanotube was removed

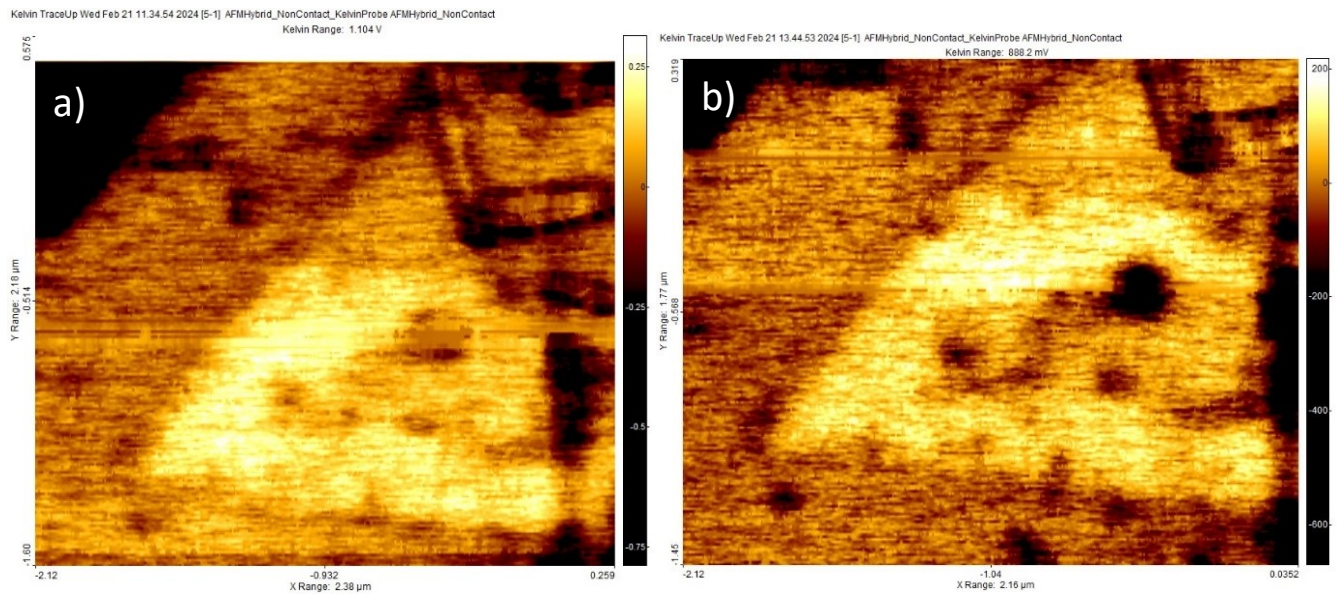

Fig. S2: a) CPD image of the flake (from Fig. S11) recorded after NT removal and prior to charge injection. b) Corresponding CPD image following the charge injection. The extracted CPD profiles are presented in Fig. 3 in the main text.

### S3. Topography of the folded section of the collapsed nanotube

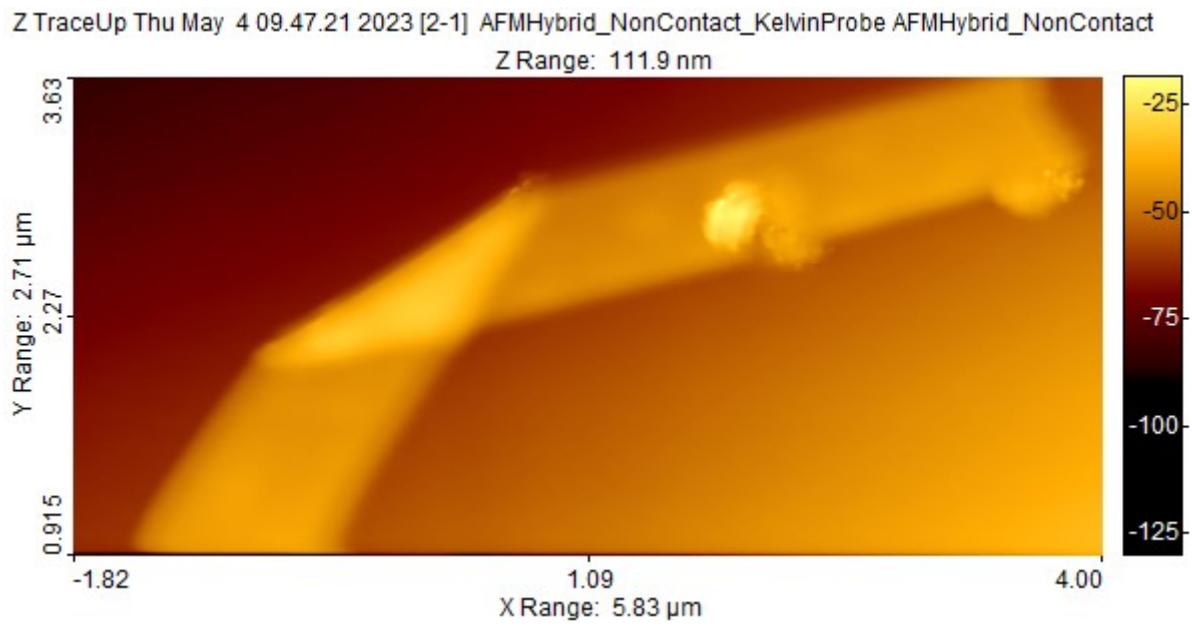

Fig. S3: Topographical image of the folded section of the collapsed NT, presented in Fig. 5 in the main text.
